1 **Phytohormone production by the arbuscular mycorrhizal**  
2 **fungus *Rhizophagus irregularis***

3 **Short title:** AM fungi produce phytohormones

4

5 **Authors**

6 Simon Pons<sup>1,2</sup>, Sylvie Fournier<sup>1,2</sup>, Christian Chervin<sup>3</sup>, Guillaume Bécard<sup>1</sup>, Soizic Rochange<sup>1</sup>,  
7 Nicolas Frei Dit Frey<sup>1\*</sup>, Virginie Puech Pagès<sup>1,2\*</sup>

8

9 **Affiliations**

10 <sup>1</sup> Laboratoire de Recherche en Sciences Végétales, Université de Toulouse, CNRS, UPS,  
11 Castanet-Tolosan, France

12 <sup>2</sup> MetaboHub-Metatoul AgromiX, Laboratoire de Recherche en Sciences Végétales, Université  
13 de Toulouse, CNRS, UPS, Castanet-Tolosan, France

14 <sup>3</sup> Génomique et Biotechnologie des Fruits, Université de Toulouse, Toulouse INP, INRA,  
15 Castanet-Tolosan, France

16

17 \*Corresponding author

18 [puech@lrsv.ups-tlse.fr](mailto:puech@lrsv.ups-tlse.fr) (VPP) and [frei-dit-frey@lrsv.ups-tlse.fr](mailto:frei-dit-frey@lrsv.ups-tlse.fr) (NFdF)

## 19 **Abstract**

20           Arbuscular mycorrhizal symbiosis is a mutualistic interaction between most land plants  
21 and fungi of the glomeromycotina subphylum. The initiation, development and regulation of this  
22 symbiosis involve numerous signalling events between and within the symbiotic partners.  
23 Among other signals, phytohormones are known to play important roles at various stages of the  
24 interaction. During presymbiotic steps, plant roots exude strigolactones which stimulate the  
25 fungus, and favour the initiation of symbiosis. At later stages, different plant hormone classes  
26 can act as positive or negative regulators of the interaction. Although the fungus is known to  
27 reciprocally emit regulatory signals, its potential contribution to the phytohormonal pool has  
28 received little attention, and has so far only been addressed by indirect assays. In this study,  
29 using mass spectrometry, we analyzed phytohormones released into the medium by germinated  
30 spores of the arbuscular mycorrhizal fungus *Rhizophagus irregularis*. We detected the presence  
31 of a cytokinin (isopentenyl-adenosine) and an auxin (indole-acetic acid). In addition, we  
32 identified a gibberellin (gibberellic acid 4) in spore extracts. We also used gas chromatography  
33 to show that *R. irregularis* produces ethylene from methionine and the  $\alpha$ -keto  $\gamma$ -  
34 methylthiobutyric acid pathway. These results highlight the possibility for AM fungi to use  
35 phytohormones to interact with their host plants, or to regulate their own development.

## 36 **Introduction**

37           Arbuscular Mycorrhizal (AM) symbiosis is a 460 million-year-old interaction [1]  
38 between glomeromycotina fungi and over 70% of land plants [2]. In angiosperms, AM fungi  
39 colonize the inner root cortex of their host to develop intracellular ramified structures called  
40 arbuscules. These arbuscules are the main site for nutrient exchange between the plant and the

41 fungus. AM fungi provide their host plant with water and minerals, and in return receive carbon  
42 sources (mainly sugars and lipids) [3,4]. As AM fungi are obligate biotrophs, this interaction is  
43 essential for their growth, development and reproduction. On the plant side, this interaction  
44 improves nutrition and resistance to biotic and abiotic stresses [5–7].

45         Prior to physical contact, the two partners of the AM symbiosis interact via signalling  
46 molecules [8,9]. Host roots release several types of compounds affecting the presymbiotic  
47 development of AM fungi, such as some flavonoids, phenolic compounds, hydroxy fatty acids  
48 [10,11]. Particular attention has been paid to the root-exuded strigolactone phytohormones: they  
49 stimulate the germination of AM fungal spores, the oxidative metabolism and branching of  
50 germinating hyphae, and finally root colonization [12–15]. In addition, *N*-acetylglucosamine-  
51 based compounds could be exchanged in both directions: lipochitooligosaccharides (LCOs) and  
52 chitooligosaccharides (COs) are released by germinating spores of AM fungi and stimulate the  
53 initiation of the symbiosis [16–18], and a plant exporter of *N*-acetylglucosamine has been shown  
54 to be required for the first steps of the interaction [19]. Finally, additional, yet unidentified,  
55 signals of plant or fungal origin may act prior to root colonization [20–23].

56         Later stages of AM interactions are regulated by a number of factors, including nutrient  
57 exchange [23] and phytohormones [24,25]. Analysis of AM symbiosis regulation by  
58 phytohormones has revealed a complex pattern of modified hormonal contents or altered  
59 response to hormones in mycorrhizal plants, and reciprocal effects of exogenous hormone  
60 application on the symbiotic interaction. Although observations were made across a wide range  
61 of combinations of plant/fungal species and experimental conditions, it is possible to draw broad  
62 conclusions about the role of the different hormone families. Auxins (AUX), abscisic acid  
63 (ABA) and brassinosteroids (BRs) have been identified as positive regulators of the AM

64 symbiosis [26–28]. On the contrary, gibberellins (GAs) and salicylic acid (SA) have been  
65 described as negative regulators of the interaction [29–31]. The effects of cytokinins have not yet  
66 been clearly established [32]. Finally, the role of ethylene (ET) and jasmonic acid (JA) seems to  
67 vary with their concentration [33–36].

68         Importantly, these studies have addressed the role of phytohormones in the AM  
69 symbiosis by two main approaches: the analysis of plant mutants affected in phytohormone  
70 synthesis or perception, or the treatment of mycorrhizal plants with exogenous hormones. The  
71 study of hormone perception mutants clearly addresses the effects of hormones on the plant. In  
72 contrast, both exogenous treatments and hormone deficiency in the plant result in modified  
73 hormonal contents in colonized roots, which could impact either or both symbionts. In spite of  
74 this, and because phytohormones are generally seen as plant signals, results of such studies are  
75 commonly interpreted exclusively in terms of impacts on the plant. Likewise, changes in  
76 hormonal contents measured in mycorrhizal plants are usually attributed to modifications of  
77 hormonal metabolism in plant cells. This interpretation ignores a potential contribution of the  
78 fungal partner to the hormonal pool. Yet, many microorganisms can produce phytohormones and  
79 this could also be the case of AM fungi. Among soil microorganisms interacting with plants,  
80 plant growth-promoting rhizobacteria and fungi have been shown to produce auxin, cytokinins,  
81 ABA and gibberellins [37–39], and this can contribute to their growth-promoting effects [40].  
82 Nitrogen-fixing rhizobia associated with legumes also produce a range of phytohormones [41]. In  
83 the fungal kingdom, phytohormone production has been documented in symbionts like  
84 ectomycorrhizal fungi [42,43], as well as in pathogens [44]. Ethylene is quite common among  
85 phytohormones produced by fungi [45–48] and in some cases the biosynthetic pathways have  
86 been characterized. The  $\alpha$ -keto  $\gamma$ -methylthiobutyric acid (KMBA) pathway, well described in

87 *Botrytis cinerea* [47], requires the deamination of methionine into KMBA. Subsequently, KMBA  
88 can be oxidised into ethylene through different means. It can either be oxidized by hydroxyl  
89 radicals [49], peroxidases [50], or in a light-dependant manner, induced by the photo-oxidation  
90 of flavins [51], leading to the production of ethylene. In contrast, the second ethylene-producing  
91 pathways in microorganisms involves a very specific enzyme. The Ethylene Forming Enzyme  
92 (EFE), described in *Penicillium digitatum*, or *Fusarium oxysporum* [45,52], produces ethylene  
93 through two simultaneous reactions using L-arginine and 2-oxoglutarate as co-substrates. Both  
94 pathways differ from the main pathway for ethylene production in plants, which involves a light-  
95 independent and methionine-dependent pathway requiring the aminocyclopropane-carboxylate  
96 (ACC) synthase (ACS) and ACC oxidase (ACO).

97         The fact that many plant-associated microorganisms produce phytohormones raises the  
98 possibility of a similar behaviour in AM fungi which have co-evolved with plants for over 400  
99 million years. This question is challenging to address experimentally, essentially because of the  
100 obligate biotrophy of these fungi. This feature implies that isolated fungi can only be kept in  
101 culture for short periods of time, and limits the availability of biological material. Nevertheless,  
102 previous studies have provided indirect evidence for the presence of phytohormones in AM  
103 fungi. ELISA tests indicated that spores and hyphae of *Rhizophagus* (formerly *Glomus*) species  
104 could contain aglycone and glycosylated ABA [53], while indirect bioassays suggested the  
105 presence of gibberellin-like and cytokinin-like molecules [54]. A direct analysis by GC-MS of  
106 spore extracts revealed the presence of small amounts of IAA in *Glomus intraradices*, but in this  
107 study spores were directly taken from maize pot cultures, hence not in axenic conditions, and  
108 may have been contaminated with root fragments or other microorganisms [55]. Genes encoding

109 a CLAVATA3/Embryo surrounding region-related (CLE) peptide hormone proposed to  
110 positively regulate the symbiosis have also been identified in AM fungal genomes [56].

111 In this study, we analysed the presence of phytohormones in germinating spores, or in  
112 their exudates, of the model AM fungus *Rhizophagus irregularis* grown axenically. We used a  
113 combination of gas/liquid chromatography and mass spectrometry to allow unambiguous  
114 compound identification. In the case of ethylene, we investigated the putative biosynthetic  
115 pathways through the use of metabolic precursors.

116

## 117 **Materials & methods**

### 118 **Chemicals, reagents and standards**

119 Phytohormone standards were purchased from Olchemim (iP, iPR, iP9G, Ki, *mT*, *tZ*, *cZ*,  
120 *tZR*, *cZR*, DHZ, BAP, GA<sub>1</sub>, IAA-Asp, JA-Ile, ABA-GE, BL), Fluka (IBA, NAA), Acros  
121 Organics (IAA, IPA, SA, ABA), Sigma-Aldrich (IAA-Ala, JA, MeJA, Strigol), Fisher chemical  
122 (GA<sub>3</sub>) and Duchefa (GA<sub>4</sub>). We prepared the standards following the manufacturer's  
123 recommendations, and stored solutions at -20 °C. L-Methionine and  $\alpha$ -keto- $\gamma$ -methylthiobutyrate  
124 (KMBA) were purchased from Sigma-Aldrich. LC/MS-grade acetonitrile and HPLC-grade  
125 methanol were purchased from Fisher Chemical, formic acid from Acros Organics, and  
126 ammonium hydroxide from Sigma-Aldrich.

127

### 128 **Fungal culture and exudate preparation**

129 *Rhizophagus irregularis* DAOM 197198 sterile spores were purchased from  
130 Agronutrition (Labège, France). The spores were produced in axenic conditions. Spore numbers

131 were determined by the supplier by counting spores in an aliquot of the sold suspension with a  
132 binocular microscope. Spores were rinsed from their storage buffer using a 40 µm nylon cell  
133 strainer (VWR) by five washes with sterile UHQ water. Spores were resuspended in sterile UHQ  
134 water and stored at 4 °C before use.

135 For the production of germinated spore exudates (GSE), spores were germinated in sterile  
136 UHQ water in a CO<sub>2</sub> incubator (30 °C, 2 % CO<sub>2</sub>) for 7 days with a concentration of 400  
137 spores.mL<sup>-1</sup> in 25 mL Petri dishes. GSE were filtered through a glass-fiber frit (Chromabond,  
138 Macherey-Nagel, France), then frozen in liquid nitrogen and freeze-dried. Filtered spores were  
139 collected and stored at -80 °C.

140

## 141 **Phytohormone and KMBA extraction**

142 **From germinated spore exudates:** freeze-dried GSE from 10,000 spores or 250,000  
143 spores of *R. irregularis* were reconstituted in 100 µL of 1 M formic acid and stored at -20°C  
144 before MS analysis.

145 **From ground spores:** the protocol of phytohormone extraction and separation by Solid  
146 Phase Extraction (SPE) was adapted from Kojima *et al.* [57] as follows. Two hundred and fifty  
147 thousand spores were hand-ground in liquid nitrogen with a mortar and pestle, resuspended in 1  
148 mL of cold modified Bielecki's solvent (methanol/water/formic acid 75:20:5, v:v:v; [58]) and  
149 left overnight at -20 °C to achieve complete extraction. The crude extracts were centrifuged for  
150 15 min at 10,000 x g, at 4 °C. The pellet was reextracted in 200 µL modified Bielecki's solvent  
151 for 30 min at -20 °C, centrifuged 15 min at 10,000 x g, and the supernatant pooled with the first  
152 one. Extracts were pre-purified on SPE Oasis HBL cartridges (1 mL per 30 mg, Waters).  
153 Cartridges were conditioned in 1 mL methanol and equilibrated in 1 mL of 1 M formic acid.

154 Two-mL samples were loaded and eluted with 1 mL modified Bielecki's solvent. Eluates  
155 containing phytohormones were dried under nitrogen stream and reconstituted in 1 mL of 1 M  
156 formic acid. The separation of phytohormones was achieved with SPE Oasis MCX cartridges (1  
157 mL per 30 mg, Waters). Cartridges were conditioned in 1 mL methanol and equilibrated in 1 mL  
158 of 1 M formic acid. Samples were successively eluted by 1 mL methanol (fraction 1, containing  
159 neutral and acidic hormones), 1 mL of 0.35 M ammonium hydroxide (fraction 2) and 1 mL  
160 methanol/0.35 M ammonium hydroxide 60:40 (fraction 3, containing cytokinins) [57]. The three  
161 fractions were dried under nitrogen stream and kept at 4 °C before analysis. Fractions were  
162 reconstituted in 100 µL 1 M formic acid and then analysed by LC-MS.

163

## 164 **LC-MS analysis of phytohormones**

165 Samples (GSEs or fractions obtained from ground spores as previously described) were  
166 analysed by UHPLC-MS with two types of mass spectrometers, a Q-Trap 5500 (AB Sciex) in  
167 MRM mode for higher detection sensitivity, and a Q-Exactive Plus™ (Thermo Scientific) for  
168 higher mass accuracy by high resolution analysis.

169 Twenty-one biological replicates of GSE and 12 replicates of ground spores were used to  
170 perform phytohormone detection. IPR was consistently identified in GSE, while IAA was  
171 detected in 76% of them, and thirteen samples were used to perform quantification. GA<sub>4</sub> was  
172 detected in 66% of the ground spore samples.

173

## 174 **Multiple reaction monitoring (MRM) analysis**

175 A UHPLC system (Dionex Ultimate 3000, Thermo Scientific) was equipped with a  
176 Kinetex C18 column (100 × 2.1 mm, 2.6 µm, 100 Å, Phenomenex) heated at 45 °C. Five-µL



177 samples were injected. Separation was performed at a constant flow rate of 0.3 mL.min<sup>-1</sup>, in a  
178 gradient of solvent A (water + 0.1% formic acid) and B (acetonitrile + 0.1% formic acid): 1 min  
179 5% B; 11 min 5% to 100% B; 2 min 100% B, and re-equilibration to the initial conditions in 4  
180 min. The Q-Trap 5500 mass spectrometer was equipped with an electrospray source. Curtain gas  
181 was set to 30 psi, nebulizer to 40 psi and turbo gas to 60 psi. Capillary voltage was set to 5.5 kV  
182 (positive mode) or -4.5 kV (negative mode) on Electrospray Ionization (ESI) source (400 °C).  
183 Samples were monitored in positive and negative modes in scheduled Multiple Reaction  
184 Monitoring (MRM) mode (60s). Using 25 standards of free or conjugated hormones, in infusion  
185 mode (7 µL.min<sup>-1</sup>), the best parameters for declustering potential, collision energy and collision  
186 cell exit potential were selected for precursor and product ions measurement. Ionization mode,  
187 selected MRM transitions, limit of detection (LOD) and retention time for each hormone are  
188 listed in S1 Table. Limits of detection and quantification were determined using standards  
189 diluted from 0.1 mM to 1pM in methanol. By this approach, we could perform an approximate  
190 quantification of phytohormones in fungal samples. Data processing was performed using  
191 Analyst 1.6.2 software.

192

### 193 **High resolution mass spectrometry (HRMS) analysis**

194 A UHPLC system (Ultimate 3000 RSLC system, Thermo Scientific) was equipped with a  
195 Hypersil Gold aQ C18 column (100 mm x 2.1 mm, 1.9 µm, 175 Å, Thermo Scientific  
196 #25302102130), heated at 35°C. Five-µL samples were injected. Separation was performed at a  
197 constant flow rate of 0.3 mL.min<sup>-1</sup>, in a gradient of solvent A (water + 0.05 % formic acid) and B  
198 (acetonitrile + 0.05 % formic acid): 1 min 5% B; 7 min 5% to 96% B; 1 min 96% B and re-  
199 equilibration to the initial conditions in 3 min. The Q-Exactive Plus<sup>TM</sup> mass spectrometer was

200 equipped with a H-ESI II probe, heated at 256 °C. Sheath gas was set to 48, sweep gas to 2,  
201 auxiliary gas to 11, and heated at 413 °C. Capillary voltage was set to 3.5 kV in positive mode  
202 and -2.5 kV in negative mode. Ionization was performed in positive and negative modes, in full  
203 scan analysis (centroid), with a resolution of 35,000. Automatic Gain Control was set to  $3 \cdot 10^6$ ,  
204 with a 50 to 600  $m/z$  scan range. A Target-MS/MS scan of confirmation of the phytohormone,  
205 based on the specified inclusion list (5 ppm), was triggered when the mass spectrometer detected  
206 a known phytohormone in an MS spectrum. In this case, Automatic Gain Control was set to  
207  $2 \cdot 10^5$ , and resolution to 17,500. Data processing was performed by Xcalibur 3.0 and Tracefinder  
208 3.2 softwares.

209

## 210 **Ethylene detection**

211 20,000 spores in 2 mL of sterile UHQ water, either untreated, or supplemented with 10  
212 mM of methionine or 1  $\mu$ M of KMBA, were incubated in a sterilized glass tube ( $\varnothing=1.35$  cm, H=  
213 6.10 cm, V=7.5 mL, dead volume = 5.5 mL) wrapped in tinfoil to avoid light exposure, and  
214 sealed with a porous silicone stopper (Hirschmann Instruments). They were germinated for three  
215 days in a CO<sub>2</sub> incubator (30°C, 2% CO<sub>2</sub>). The stopper was then replaced by an air-tight rubber  
216 stopper, and spores were confined for 1 day and exposed or not to light  
217 ( $100 \mu\text{mol photons m}^{-2} \text{s}^{-1}$ , 21°C).

218 The headspace ethylene content was assayed by gas chromatography as described  
219 previously [59]. One mL of headspace gas was manually injected into a GC-FID (Agilent  
220 7820a), equipped with a 80/100 alumina column (1/8" x 2 mm x 1.5 m, Agilent) and set with the  
221 following parameters: oven temperature 70 °C, injector temperature 110 °C, N<sub>2</sub> vector gas flow  
222 rate 28 mL.min<sup>-1</sup>, flame ionization detector temperature 250 °C. Ethylene peak area was

223 measured and normalized with the O<sub>2</sub> injection peak area. Its retention time and calibration were  
224 determined with an external standard of 4 ppm of ethylene.

225 For ethylene production assays: darkness without spores n=13, light without spores n=16,  
226 darkness with spores n=17, light with spores n=18, light and methionine without spores n=7,  
227 darkness and methionine with spores n=9, light and methionine with spores n=24, light and  
228 KMBA without spores n=6, light and KMBA with spores n=6.

229

## 230 **KMBA detection by LC-MS**

231 A UHPLC system (Dionex Ultimate 3000, Thermo Scientific) was equipped with a  
232 reverse-phase column Acquity UPLC BEH-C18 (2.1 × 150 mm, 1.7 μm, Waters) heated at 45  
233 °C. Ten-μL samples were injected. Separation was performed at a constant flow rate of 0.3  
234 mL.min<sup>-1</sup>, in a gradient of solvent A (water + 0.1% formic acid) and B (acetonitrile): 1 min 5%  
235 B; 8 min 5% to 100% B; 2 min 100% B, and re-equilibration to the initial conditions in 2 min.

236 A Q-Trap 4500 mass spectrometer (AB Sciex) was used with an electro-spray ionization  
237 source in the negative ion mode. Curtain gas was set to 30 psi, nebulizer to 40 psi and turbo gas  
238 to 60 psi. Capillary voltage was set to -3.5 kV (negative mode) on Electrospray Ionization (ESI)  
239 source (400 °C). Optimizations of the source parameters were done using the KMBA standard at  
240 10<sup>-5</sup> M water by infusion at 7 μL.min<sup>-1</sup>, using a syringe pump. Three GSE sample were analysed  
241 for each condition. Data processing was performed using Analyst 1.6.2 software.

242

## 243 **Sequence analysis**

244 Glomeromycotina (taxid:214504) nucleotide and protein sequences were analysed using  
245 TBLASTN and BLASTP searches with default parameters on the NCBI website. The 2-

246 oxoglutarate-dependent ethylene/succinate-forming enzyme from *Penicillium digitatum*  
247 XP\_014538251.1 was chosen as query to identify putative EFEs in *R. irregularis*.

248

## 249 **Statistical analysis**

250 The version 4.0.0 of R, with the version 1.3-1 of package Agricolae and the version 3.1.0  
251 of package GGPlot2 were used for statistical analysis. In order to compare ethylene production  
252 between all groups, a non-parametric analysis was carried out using Kruskal-Wallis test and  
253 pairwise comparisons were performed using FDR adjustment for multiple comparisons.

254

## 255 **Results**

### 256 **Detection of phytohormones in germinated spore exudates and** 257 **germinated spore extracts**

258 The aim of this study was to investigate the production of phytohormones by the model  
259 AM fungus *R. irregularis*. To avoid any contamination with plant-borne phytohormones, it was  
260 crucial to start from pure fungal material. We used spores of *R. irregularis* produced in axenic  
261 conditions, and the spores, free of root debris, were carefully rinsed to eliminate the storage  
262 solution.

263 We started with an analysis of exudates produced by *R. irregularis* spores germinated in  
264 water for seven days. These Germinated Spore Exudates (GSE) were concentrated and analysed  
265 by Liquid Chromatography (LC) coupled to Mass Spectrometry (MS). The detection of a total of  
266 38 compounds, covering eight hormone families (S1 Table), was attempted. Synthetic standards

267 were available for 25 of these compounds, allowing direct comparison of retention times and MS  
268 data. Two types of MS analyses were successively carried out. The highly sensitive Multiple  
269 Reaction Monitoring (MRM) mode was used to look for characteristic precursor-to-product-ion  
270  $m/z$  transitions upon fragmentation. The retention times associated with these  $m/z$  transition  
271 signals were compared with the retention times of corresponding standards. To further ascertain  
272 hormone identification, High-Resolution Mass Spectrometry (HRMS) was then used to extract  
273 signals for precursor and product ions of the expected accurate  $m/z$  ( $\pm$  5 ppm), and again was  
274 performed in comparison with standards.

275         Using these two approaches, we identified two hormones in GSE samples produced by  
276 10,000 spores: the cytokinin isopentenyl-adenosine (iPR) and the auxin indole-acetic acid (IAA)  
277 (Fig 1A and D). In the MRM mode, iPR was detected with the  $m/z$  transitions  $336 > 204$  and  $336$   
278  $> 136$ ; IAA was identified with the  $m/z$  transitions  $176 > 130$  and  $176 > 77$  (Fig 1B and E). For  
279 both compounds, the observed retention times matched those of the corresponding standards (Fig  
280 1B and E). We were able to detect accurately iPR and IAA in 16 out of 21 biological replicates.  
281 The other phytohormones presented in S1 Table were not detected in the GSE samples.  
282 According to external standard curves, we estimated that one spore could on average exude 1.2  
283 attomole of iPR ( $\pm$  1.3 attomole) and 29 attomole of IAA ( $\pm$  25 attomole), during seven days  
284 of germination. Compound identification was confirmed through HRMS using GSE from  
285 250,000 spores. The precursor ion of  $m/z$  336.1662 for iPR, detected at a retention time of 5.78  
286 min (Fig 1C), yielded after selection and fragmentation a product ion of  $m/z$  204.1246 (S1 Fig).  
287 The precursor ion of  $m/z$  176.0706 for IAA, detected at a retention time of 6.18 min (Fig 1F),  
288 yielded after selection and fragmentation a product ion of  $m/z$  130.0650 (S2 Fig). The mass data,  
289 as well as retention times, matched those of the corresponding standards (Fig 1C and F).

290

291 **Fig. 1 Detection by LC-MS of iPR and IAA exuded by *R. irregularis* spores**

292 (A) Structure and fragmentation pattern of iPR. (B) UPLC-MRM-MS chromatograms of iPR in  
293 positive mode. Blue lines represent the signals obtained for iPR external standard (100 nM). Red  
294 lines represent the signals obtained with GSE produced by 10,000 *R. irregularis* spores. Plain  
295 lines are for  $m/z$  transition  $336 > 204$ . Dashed lines are for  $m/z$  transition  $336 > 136$ . (C) LC-  
296 HRMS extracted ion chromatogram (XIC) for  $m/z = 336.1666$  ( $\pm 5$ ppm). The blue line  
297 represents the signal obtained for iPR external standard (300 nM). The red line represents the  
298 signal obtained with GSE produced by 250,000 *R. irregularis* spores. (D) Structure and  
299 fragmentation pattern of IAA. (E) UPLC-MRM-MS chromatograms of IAA in positive mode.  
300 Blue lines represent the signals obtained for IAA external standard (100 nM). Red lines represent  
301 the signals obtained with GSE produced by 10,000 *R. irregularis* spores. Plain lines are for  $m/z$   
302 transition  $176 > 131$ . Dashed lines are for  $m/z$  transition  $176 > 77$ . (F) LC-HRMS XIC for  $m/z =$   
303  $176.0705$  ( $\pm 5$ ppm). The blue line represents the signal obtained for IAA external standard (300  
304 nM). The red line represents the signal obtained with GSE produced by 250,000 *R. irregularis*  
305 spores. Signal intensities are displayed in counts per second (cps).

306

307 To investigate whether additional hormones could be present in *R. irregularis* spores, but  
308 not released (or in very low amounts) into GSE, we next analysed extracts of 250,000 ground  
309 spores. Extracts were pre-purified through two solid-phase extraction (SPE) steps and the  
310 fractions where hormones were expected were analysed by LC-MS/MS. This approach allowed  
311 the detection in MRM mode of MS-MS transition signals characteristic of a third phytohormone,  
312 gibberellic acid 4 (GA<sub>4</sub>). Transitions  $m/z$   $331 > 257$  and  $331 > 213$  (Fig 2A) were detected in our

313 samples, at almost the same retention time as the standard (retention time shift = -0.09 min, Fig  
314 2B). To investigate whether this slight shift was due to matrix interactions [60], we spiked our  
315 sample with the GA<sub>4</sub> standard. This addition yielded a single chromatographic peak without any  
316 splitting, at the same retention time as the spore sample alone and with a doubled intensity. We  
317 can therefore attribute the slight retention time difference in Fig 2B to matrix interactions during  
318 chromatographic separation.

319

## 320 **Fig. 2 GA<sub>4</sub> detection in multiple reactions monitoring (MRM) mode**

321 (A) Structure and fragmentation pattern of GA<sub>4</sub>. (B) UPLC-MRM-MS chromatogram of GA<sub>4</sub> in  
322 negative mode. Top (blue lines): External standard (30 nM) of GA<sub>4</sub>. Middle (red lines): pre-  
323 purified SPE fraction from 250,000 ground spores of *R. irregularis*. Bottom (purple lines): pre-  
324 purified SPE fraction from 250,000 ground spores of *R. irregularis* spiked with GA<sub>4</sub> standard to  
325 a final concentration of 30 nM. Plain lines are for *m/z* transition 331 > 213. Dashed lines are for  
326 *m/z* transition 331 > 257. Signal intensities are displayed in counts per second (cps).

327

## 328 **Production of ethylene by *R. irregularis* germinated spores**

329 The release of ethylene by germinating spores was analysed by gas chromatography. To  
330 this end, spores were first allowed to germinate for three days in water, in test tubes closed with a  
331 gas-permeable stopper. The stopper was then replaced by a gas-tight rubber stopper, and spores  
332 were incubated for an additional 24 hours. Gas in the headspace was then sampled for ethylene  
333 analysis. As detailed below, light dependency can be used as a criterion to distinguish between  
334 ethylene biosynthesis pathways. Therefore, ethylene production was assessed comparatively in  
335 spores protected or not from light.

336 We noticed in control tubes containing no spores that a background quantity of ethylene  
337 was produced in the dark as well as in the light (Fig 3, conditions 1 and 2) [61]. The presence of  
338 spores slightly enhanced ethylene production in the dark (Fig 3, conditions 1 and 5). When  
339 exposed to light, germinating spores produced about 3 times more ethylene than in the dark,  
340 suggesting that this production was dependent on the KMBA pathway (Fig 3, conditions 5 and 7)  
341 [47,49,51].

342

### 343 **Fig. 3 Ethylene production by *R. irregularis* in response to different treatments**

344 20,000 spores were germinated for three days in the dark, in the presence or absence of 10 mM  
345 methionine (Met) or 1  $\mu$ M  $\alpha$ -keto  $\gamma$ -methylthiobutyric acid (KMBA). Tubes were then sealed  
346 with a gas-tight stopper and exposed to light or darkness for 24h. One mL of the headspace gas  
347 was then analysed by gas chromatography. Different letters indicate different statistical groups  
348 (pairwise Kruskal-Wallis test with FDR correction,  $P < 0.05$ )

349

350 To investigate whether the KMBA pathway for ethylene synthesis was used by *R.*  
351 *irregularis*, we tested the effects of adding methionine into the incubation medium. In the dark,  
352 methionine addition increased ethylene production by 55 % (Fig 3, conditions 5 and 6). While in  
353 the light, methionine addition did not increase ethylene production in the absence of spores (Fig  
354 3, conditions 2 and 3), this addition in the presence of spores increased ethylene production by  
355 56 % (Fig 3, conditions 7 and 8). We then tested the effects of added KMBA. In the light and in  
356 the absence of spores, KMBA did not yield ethylene (Fig 3, conditions 2 and 4). In contrast, in  
357 the presence of spores, KMBA addition stimulated an ethylene production (Fig 3, conditions 7  
358 and 9) similar to the methionine treatment.



359 Finally, we analysed by LC/MS the presence of KMBA in the exudates of spores  
360 germinated in the presence or not of methionine. This experiment was carried out in the dark to  
361 avoid light oxidation of KMBA. We could not detect the presence of KMBA in samples without  
362 methionine whereas we detected a strong KMBA signal in the methionine-treated samples, at a  
363 retention time of 3.7 min in MRM mode ( $m/z$  transitions  $147 > 46$  and  $147 > 99$ ) (S3 Fig).

364 Genomic sequences of Glomeromycotina were analysed for the presence of genes  
365 associated with the different ethylene biosynthesis pathways. The KMBA pathway requires the  
366 deamination of methionine into KMBA, which can be mediated by any transaminase, and the  
367 oxidation of KMBA into ethylene can be carried out non-specifically by peroxidases, or  
368 chemically [49,62,63]. Therefore, sequence analyses are not suitable to investigate the existence  
369 of this pathway. To look for genes associated with the major ACC pathway used by plants,  
370 AtACS1, AtACS8 and AtACS7 were chosen as representative of the three ACS clades described  
371 in Arabidopsis [64]. In the three cases, a tyrosine aminotransferase (GLOIN\_2v1675208) and a  
372 pyridoxal phosphate-dependent transferase (GLOIN\_2v1486204) were found as the best hits in  
373 *R. irregularis* genome, with only a maximum of 24% identity at the amino acid level with the  
374 query sequence. We also used AtACO2, AtACO1 and AtACO5 as representative of the three  
375 ACC oxidases (ACO) clades [65]. With these three queries, only hypothetical proteins with less  
376 than 26% of identity were found in *R. irregularis* datasets. To look for genes of the EFE  
377 pathway, BLAST analysis using the *Penicillium digitatum* EFE protein as query allowed the  
378 identification of two isoforms of a protein annotated as Fe (2+) and 2-oxoglutarate (2OG)-  
379 dependent dioxygenases in *R. irregularis* (GBC41587.1 and GBC41586.1). However, the  
380 similarity with the *P. digitatum* protein was very low (23-24% of identity).

381

## 382 **Discussion**

383 Germinated spore exudates of AM fungi are known to trigger a number of symbiotically  
384 relevant responses in host root cells [66–68], indicating that isolated AM fungal spores release  
385 molecular signals within a few days of incubation. GSE form a matrix of relatively low  
386 complexity, which favours sensitive compound detection through mass spectrometry. We thus  
387 started our study by analysing GSE for the presence of a wide variety of phytohormones. The  
388 presence of iPR and IAA was unambiguously demonstrated by a combination of MRM and  
389 HRMS analyses, in GSE samples obtained from relatively small amounts of fungal material  
390 (10,000 spores). Although the presence of cytokinin-like compounds and of IAA was already  
391 suspected in AM fungi [54,55], the present study is to our knowledge the first conclusive report  
392 for the release of these two phytohormones by an AM fungus. It is of course possible that other  
393 phytohormones are present in low amounts in GSE, and have escaped detection despite the high  
394 sensitivity of the MRM approach (see S1 Table for detection limits).

395 Analysis of spore extracts was undertaken as a complementary approach to look for  
396 hormones that would not be released into GSE. This allowed the detection of MRM signals  
397 corresponding to GA<sub>4</sub>, at a retention time very close to that of the standard. Despite pre-  
398 purification, the fractions of spore extracts remain a complex matrix, which can induce slight  
399 shifts in chromatographic retention times. Using a GA<sub>4</sub> standard to spike our sample allowed us  
400 to observe that the retention times recorded in the spore sample for both MRM transitions were  
401 identical to those of the standard in this matrix (Fig 2). Unfortunately, complex matrices decrease  
402 the sensitivity of HRMS analysis. We were thus unable to confirm the identity of this compound  
403 through accurate *m/z* determination. Our preliminary observations are however consistent with  
404 the previous bioassay-based detection of gibberellin-like compounds in AM fungi [54]. Given

405 that gibberellins can be synthesised (and were actually discovered) in other fungi, it would make  
406 evolutionary sense to find them also in AM fungi

407 In contrast with Esch *et al.* [53], we did not detect the presence of ABA or glycosylated  
408 ABA. This difference might be due to the use of different fungal materials. The study of Esch *et*  
409 *al.* was carried out on an unspecified species of the genus *Rhizophagus* (formerly *Glomus*), and  
410 perhaps more importantly, the analysed material consisted of extraradical mycelium and spores  
411 obtained non axenically after several weeks of culture in pots. Furthermore, in this study, ABA  
412 detection was based on indirect ELISA tests, which likely differ from mass spectrometry in  
413 terms of sensitivity and specificity.

414 The detection of an auxin, a cytokinin and a gibberellin in *R. irregularis* does not mean  
415 that this fungus is actually able to synthesize these molecules. They could have been produced by  
416 the host plant (here the hairy roots of *Daucus carota*), imported by the fungus during the  
417 symbiotic exchanges between the two partners and stored in spores. Isotopic labelling  
418 experiments could be used to investigate the biosynthetic origin of these hormones, but the  
419 difficult incorporation of labelled precursors into fungal cells would likely limit the effectiveness  
420 of this approach.

421 Unlike the above hormones, there is no doubt about the fungal biosynthetic origin of  
422 ethylene. *De novo* ethylene production was measured over a period of 24 h and could be  
423 stimulated by the addition of methionine, a metabolic precursor. The addition of methionine  
424 strongly enhanced the synthesis of KMBA by the fungus (Fig S3) and acted synergistically with  
425 exposure to light to promote ethylene production (Fig 2). Light- and methionine-dependency are  
426 characteristic features of the KMBA pathway described in other fungi [47]. Hence, although we  
427 cannot rule out the existence of additional ethylene biosynthetic pathways, our biochemical data

428 support the KMBA pathway as being involved in the synthesis of ethylene in *R. irregularis*.  
429 Interestingly, KMBA-derived ethylene was also demonstrated in the ectomycorrhizal fungi  
430 *Tuber brochii* and *T. melanosporum* [48]. To further investigate the existence of alternative  
431 pathways for ethylene synthesis in *R. irregularis*, we analysed Glomeromycotina genomic  
432 sequences. BLAST analyses failed to identify genes with a high homology with those involved  
433 in the classical ACC pathway found in plants. Similarly, the best hits obtained when searching  
434 for a fungal EFE exhibited limited identity with the query sequence. The fact that enzymes in the  
435 EFE family can be involved in the biosynthesis of a multitude of products [69] sheds further  
436 doubt on the role of their *Rhizophagus* homologs in ethylene synthesis. Further studies would be  
437 necessary to formally exclude the existence of these two biosynthetic pathways in *R. irregularis*,  
438 but in view of these initial investigations, their existence seems unlikely.

439         The observation that iPR, IAA and ethylene are released by germinating spores into their  
440 environment is consistent with a signalling role in the AM symbiosis. A similar hypothesis was  
441 proposed by Le Marquer *et al.* [56] with CLE peptides, another type of plant hormone potentially  
442 produced and excreted by AM fungi. First, if these hormones are still released at late stages, they  
443 could contribute directly to changes in hormonal contents in mycorrhizal plants. For example,  
444 AM colonization has been shown to increase auxin concentration in roots of *M. truncatula*, *Zea*  
445 *mays* and *Glycine max* [55,70,71]. In tomato roots, the expression of the auxin-dependent  
446 reporter DR5-GUS was higher in arbuscule-containing cells than in the surrounding cells [26].  
447 This higher auxin concentration could be partly due to the AM fungus exudation and exportation  
448 to root tissues. Second, the release of these hormones by AM fungi could have profound effects  
449 on the symbiosis itself, such as the positive effects observed upon auxin treatment [72]. These  
450 hormones could also act through a modulation of plant development. For example, the

451 simultaneous exudation of IAA and Myc-LCOs by the fungus could have synergistic effect on  
452 lateral root formation, as shown by Buendia *et al.* [73] with exogenous treatments on  
453 *Brachypodium distachyon*. The possible effects of ethylene released by the fungus are more  
454 difficult to predict. In arbuscular mycorrhiza, ethylene is mostly described as a negative regulator  
455 [30,66,74,75]. This conclusion was mainly drawn from studies using plant mutants disturbed in  
456 the production or perception of ethylene. As already proposed, the negative downstream effect of  
457 these mutations on AM symbiosis may also result from crosstalks with additional  
458 phytohormones and not directly from modifications in ethylene signalling *per se* [35]. Whether  
459 through direct or indirect mechanisms, the production of ethylene by AM fungi could serve to  
460 prevent excessive colonization of the root system. It is also important to note that ethylene  
461 inhibition of AM symbiosis was shown to be concentration-dependent [35] and that in some  
462 cases, a low ethylene concentration was able to stimulate root colonization [36].

463 In addition to hormonal signalling to the plant, it is also possible that AM fungi use  
464 phytohormones to regulate their own development. In support of this hypothesis, candidate genes  
465 putatively encoding ethylene and cytokinin receptors were recently identified in the genome of  
466 *R. irregularis* [76] and await functional characterization. This study was focused on histidine  
467 kinases, and thus does not exclude the existence of other types of receptors for other  
468 phytohormones in AM fungi. Indeed, a variety of hormones can affect AM fungal development  
469 *in vitro* [12–14,36,77,78]. It can also be noted that phytohormone exudation by plant roots is not  
470 restricted to strigolactones, and has also been reported for auxin, abscisic acid, jasmonate,  
471 salicylate and a cytokinin [79–82]. Bringing together these observations, it is tempting to  
472 speculate on the exchange of several hormonal signals in both directions during AM symbiosis,  
473 in addition to the well-known effects of phytohormones as internal regulators of plant

474 physiology. Interestingly, the use of a common language has been reported in diverse contexts of  
475 host-microbe interactions. For example, plant bacterial pathogens produce cytokinin and have  
476 evolved a corresponding receptor [83], and gut bacteria produce and possess sensors for  
477 neuroendocrine hormones that were once thought to be specific of their host [84,85]. Plants have  
478 lived with AM symbionts since they colonized land, and the molecular language underlying this  
479 long-standing and intimate relationship is only beginning to be unravelled. Deciphering the  
480 hormonal biosynthesis and perception pathways in AM fungi will certainly help to understand  
481 how this common language developed through evolution.

482

## 483 **Acknowledgments**

484 We thank Cyril Libourel, Marielle Aguilar and Helene San Clemente for their help with  
485 statistical analyses. We thank Maryne Laigle, Virginie Durand and Thibaut Perez for their help  
486 with mass spectrometry analysis.

487 Support for mass spectrometry analyses was provided by the ICT-Mass spectrometry and  
488 MetaboHUB-MetaToul- AgromiX Facilities.

489

## 490 **References**

491

- 492 1. Redecker D. Glomalean Fungi from the Ordovician. *Science*. 2000;289: 1920–1921.  
493 doi:10.1126/science.289.5486.1920
- 494 2. Brundrett MC, Tedersoo L. Evolutionary history of mycorrhizal symbioses and global  
495 host plant diversity. *New Phytol*. 2018;220: 1108–1115. doi:10.1111/nph.14976
- 496 3. Smith S, Read D. *Mycorrhizal Symbiosis*. Academic Press; 2008. doi:10.1016/B978-0-12-

- 497 370526-6.X5001-6
- 498 4. Keymer A, Gutjahr C. Cross-kingdom lipid transfer in arbuscular mycorrhiza symbiosis  
499 and beyond. *Curr Opin Plant Biol.* 2018;44: 137–144. doi:10.1016/j.pbi.2018.04.005
- 500 5. Smith SE, Smith FA, Jakobsen I. Mycorrhizal fungi can dominate phosphate supply to  
501 plants irrespective of growth responses. *Plant Physiol.* 2003;133: 16–20.  
502 doi:10.1104/pp.103.024380
- 503 6. Pozo MJ, Azcón-Aguilar C. Unraveling mycorrhiza-induced resistance. *Current Opinion*  
504 *in Plant Biology.* 2007. pp. 393–398. doi:10.1016/j.pbi.2007.05.004
- 505 7. Mohammadi K, Shiva Khalesro, Sohrabi Y, Heidari G. A Review□: Beneficial Effects of  
506 the Mycorrhizal Fungi for Plant Growth. *J Appl Environ Biol Sci.* 2011;1: 310–319.  
507 Available: [www.textroad.com](http://www.textroad.com)
- 508 8. Choi J, Summers W, Paszkowski U. Mechanisms Underlying Establishment of Arbuscular  
509 Mycorrhizal Symbioses. *Annu Rev Phytopathol.* 2018;56: 135–160. doi:10.1146/annurev-  
510 phyto-080516-035521
- 511 9. Maclean AM, Bravo A, Harrison MJ. Plant signaling and metabolic pathways enabling  
512 arbuscular mycorrhizal symbiosis. *Plant Cell American Society of Plant Biologists.* 2017.  
513 pp. 2319–2335. doi:10.1105/tpc.17.00555
- 514 10. Bécard G, Kosuta S, Tamasloukht M, Séjalon-Delmas N, Roux C. Partner communication  
515 in the arbuscular mycorrhizal interaction. *Canadian Journal of Botany.* 2004. pp. 1186–  
516 1197. doi:10.1139/B04-087
- 517 11. Nagahashi G, Douds DD. The effects of hydroxy fatty acids on the hyphal branching of  
518 germinated spores of AM fungi. *Fungal Biol.* 2011;115: 351–358.  
519 doi:10.1016/j.funbio.2011.01.006

- 520 12. Akiyama K, Matsuzaki K, Hayashi H. Plant sesquiterpenes induce hyphal branching in  
521 arbuscular mycorrhizal fungi. *Nature*. 2005;435: 824–827. doi:10.1038/nature03608
- 522 13. Besserer A, Bécard G, Jauneau A, Roux C, Séjalon-Delmas N. GR24, a Synthetic Analog  
523 of Strigolactones, Stimulates the Mitosis and Growth of the Arbuscular Mycorrhizal  
524 Fungus *Gigaspora rosea* by Boosting Its Energy Metabolism. *Plant Physiol*. 2008;148:  
525 402–413. doi:10.1104/pp.108.121400
- 526 14. Besserer A, Puech-Pagès V, Kiefer P, Gomez-Roldan V, Jauneau A, Roy S, et al.  
527 Strigolactones Stimulate Arbuscular Mycorrhizal Fungi by Activating Mitochondria.  
528 *PLoS Biol*. 2006;4: e226. doi:10.1371/journal.pbio.0040226
- 529 15. Gomez-Roldan V, Fermas S, Brewer PB, Puech-Pagès V, Dun EA, Pillot J-P, et al.  
530 Strigolactone inhibition of shoot branching. *Nature*. 2008;455: 189–194.  
531 doi:10.1038/nature07271
- 532 16. Maillet F, Poinot V, André O, Puech-Pagès V, Haouy A, Gueunier M, et al. Fungal  
533 lipochitooligosaccharide symbiotic signals in arbuscular mycorrhiza. *Nature*. 2011;469:  
534 58–64. doi:10.1038/nature09622
- 535 17. Genre A, Chabaud M, Balzergue C, Puech-Pagès V, Novero M, Rey T, et al. Short-chain  
536 chitin oligomers from arbuscular mycorrhizal fungi trigger nuclear Ca<sup>2+</sup> spiking in  
537 *Medicago truncatula* roots and their production is enhanced by strigolactone. *New Phytol*.  
538 2013;198: 190–202. doi:10.1111/nph.12146
- 539 18. Volpe V, Carotenuto G, Berzero C, Cagnina L, Puech-Pagès V, Genre A. Short chain  
540 chito-oligosaccharides promote arbuscular mycorrhizal colonization in *Medicago*  
541 *truncatula*. *Carbohydr Polym*. 2020;229: 115505. doi:10.1016/j.carbpol.2019.115505
- 542 19. Nadal M, Sawers R, Naseem S, Bassin B, Kulicke C, Sharman A, et al. An N-



- 543 acetylglucosamine transporter required for arbuscular mycorrhizal symbioses in rice and  
544 maize. *Nat Plants*. 2017;3. doi:10.1038/nplants.2017.73
- 545 20. Gutjahr C, Gobbato E, Choi J, Riemann M, Johnston MG, Summers W, et al. Rice  
546 perception of symbiotic arbuscular mycorrhizal fungi requires the karrikin receptor  
547 complex. *Science*. 2015;350: 1521–1524. doi:10.1126/science.aac9715
- 548 21. Choi J, Lee T, Cho J, Servante EK, Pucker B, Summers W, et al. The negative regulator  
549 SMAX1 controls mycorrhizal symbiosis and strigolactone biosynthesis in rice. *Nat*  
550 *Commun*. 2020;11: 2114. doi:10.1038/s41467-020-16021-1
- 551 22. Sun X guang, Bonfante P, Tang M. Effect of volatiles versus exudates released by  
552 germinating spores of *Gigaspora margarita* on lateral root formation. *Plant Physiol*  
553 *Biochem*. 2015;97: 1–10. doi:10.1016/j.plaphy.2015.09.010
- 554 23. Lanfranco L, Fiorilli V, Gutjahr C. Partner communication and role of nutrients in the  
555 arbuscular mycorrhizal symbiosis. *New Phytologist*. 2018. pp. 1031–1046.  
556 doi:10.1111/nph.15230
- 557 24. Liao D, Wang S, Cui M, Liu J, Chen A, Xu G. Phytohormones regulate the development  
558 of arbuscular mycorrhizal symbiosis. *International Journal of Molecular Sciences*. 2018. p.  
559 3146. doi:10.3390/ijms19103146
- 560 25. Gutjahr C. Phytohormone signaling in arbuscular mycorrhiza development. *Current*  
561 *Opinion in Plant Biology*. 2014. pp. 26–34. doi:10.1016/j.pbi.2014.04.003
- 562 26. Etemadi M, Gutjahr C, Couzigou JM, Zouine M, Laressergues D, Timmers A, et al.  
563 Auxin perception is required for arbuscule development in arbuscular mycorrhizal  
564 symbiosis. *Plant Physiol*. 2014;166: 281–292. doi:10.1104/pp.114.246595
- 565 27. Martín-Rodríguez JÁ, León-Morcillo R, Vierheilig H, Ocampo JA, Ludwig-Müller J,

- 566           García-Garrido JM. Ethylene-dependent/ethylene-independent ABA regulation of tomato  
567           plants colonized by arbuscular mycorrhiza fungi. *New Phytol.* 2011;190: 193–205.  
568           doi:10.1111/j.1469-8137.2010.03610.x
- 569   28.   Bitterlich M, Krügel U, Boldt-Burisch K, Franken P, Kühn C. The sucrose transporter  
570           SISUT2 from tomato interacts with brassinosteroid functioning and affects arbuscular  
571           mycorrhiza formation. *Plant J.* 2014;78: 877–889. doi:10.1111/tpj.12515
- 572   29.   Foo E, Ross JJ, Jones WT, Reid JB. Plant hormones in arbuscular mycorrhizal symbioses:  
573           An emerging role for gibberellins. *Ann Bot.* 2013;111: 769–779. doi:10.1093/aob/mct041
- 574   30.   Torres de Los Santos R, Vierheilig H, Ocampo JA, García Garrido JM. Altered pattern of  
575           arbuscular mycorrhizal formation in tomato ethylene mutants. *Plant Signal Behav.* 2011;6:  
576           755–758. doi:10.4161/psb.6.5.15415
- 577   31.   Herrera Medina MJ, Gagnon H, Piché Y, Ocampo JA, García Garrido JM, Vierheilig H.  
578           Root colonization by arbuscular mycorrhizal fungi is affected by the salicylic acid content  
579           of the plant. *Plant Sci.* 2003;164: 993–998. doi:10.1016/S0168-9452(03)00083-9
- 580   32.   Boivin S, Fonouni-Farde C, Frugier F. How auxin and cytokinin phytohormones modulate  
581           root microbe interactions. *Frontiers in Plant Science.* 2016. doi:10.3389/fpls.2016.01240
- 582   33.   Landgraf R, Schaarschmidt S, Hause B. Repeated leaf wounding alters the colonization of  
583           *Medicago truncatula* roots by beneficial and pathogenic microorganisms. *Plant Cell*  
584           *Environ.* 2012;35: 1344–1357. doi:10.1111/j.1365-3040.2012.02495.x
- 585   34.   Ludwig-Müller J, Bennett RN, García-Garrido JM, Piché Y, Vierheilig H. Reduced  
586           arbuscular mycorrhizal root colonization in *Tropaeolum majus* and *Carica papaya* after  
587           jasmonic acid application can not be attributed to increased glucosinolate levels. *J Plant*  
588           *Physiol.* 2002;159: 517–523. doi:10.1078/0176-1617-00731

- 589 35. Khatabi B, Schäfer P. Ethylene in mutualistic symbioses. *Plant Signal Behav.* 2012;7:  
590 1634–1638. doi:10.4161/psb.22471
- 591 36. Ishii T, Shrestha YH, Matsumoto I, Kadoya K. Effect of ethylene on the growth of  
592 vesicular-arbuscular mycorrhizal fungi and on the mycorrhizal formation of trifoliolate  
593 orange roots. *J Japanese Soc Hortic Sci.* 1996;65: 525–529. doi:10.2503/jjshs.65.525
- 594 37. Kudoyarova G, Arkhipova T, Korshunova T, Bakaeva M, Loginov O, Dodd IC.  
595 Phytohormone Mediation of Interactions Between Plants and Non-Symbiotic Growth  
596 Promoting Bacteria Under Edaphic Stresses. *Frontiers in Plant Science.* 2019;10:1368  
597 doi:10.3389/fpls.2019.01368
- 598 38. Kang SM, Khan AL, Hamayun M, Hussain J, Joo GJ, You YH, et al. Gibberellin-  
599 producing *Promicromonospora* sp. SE188 improves *Solanum lycopersicum* plant growth  
600 and influences endogenous plant hormones. *J Microbiol.* 2012;50: 902–909.  
601 doi:10.1007/s12275-012-2273-4
- 602 39. Hamayun M, Khan SA, Khan AL, Rehman G, Kim YH, Iqbal I, et al. Gibberellin  
603 production and plant growth promotion from pure cultures of *Cladosporium* sp. MH-6  
604 isolated from cucumber (*Cucumis sativus* L.). *Mycologia.* 2010;102: 989–995.  
605 doi:10.3852/09-261
- 606 40. Spaepen S, Bossuyt S, Engelen K, Marchal K, Vanderleyden J. Phenotypical and  
607 molecular responses of *Arabidopsis thaliana* roots as a result of inoculation with the  
608 auxin-producing bacterium *Azospirillum brasilense*. *New Phytol.* 2014;201: 850–861.  
609 doi:10.1111/nph.12590
- 610 41. Ferguson BJ, Mathesius U. Phytohormone Regulation of Legume-Rhizobia Interactions.  
611 *Journal of Chemical Ecology.* 2014. pp. 770–790. doi:10.1007/s10886-014-0472-7

- 612 42. Gay G, Normand L, Marmeisse R, Sotta B, Debaud JC. Auxin overproducer mutants of  
613 *Hebeloma cylindrosporum* Romagnesi have increased mycorrhizal activity. *New Phytol.*  
614 1994;128: 645–657. doi:10.1111/j.1469-8137.1994.tb04029.x
- 615 43. Raudaskoski M, Kothe E. Novel findings on the role of signal exchange in arbuscular and  
616 ectomycorrhizal symbioses. *Mycorrhiza*. 2015. pp. 243–252. doi:10.1007/s00572-014-  
617 0607-2
- 618 44. Chanclud E, Morel J-B. Plant hormones: a fungal point of view. *Mol Plant Pathol.*  
619 2016;17: 1289–1297. doi:10.1111/mpp.12393
- 620 45. Chou TW, Yang SF. The biogenesis of ethylene in *Penicillium digitatum*. *Arch Biochem*  
621 *Biophys.* 1973;157: 73–82. doi:10.1016/0003-9861(73)90391-3
- 622 46. Graham JH, Linderman RG. Ethylene production by ectomycorrhizal fungi, *Fusarium*  
623 *oxysporum* f.sp.pini, and by aseptically synthesized ectomycorrhizae and *Fusarium*-  
624 infected Douglas-fir roots. *Can J Microbiol.* 1980;26: 1340–1347. doi:10.1139/m80-222
- 625 47. Chagué V, Elad Y, Barakat R, Tudzynski P, Sharon A. Ethylene biosynthesis in *Botrytis*  
626 *cinerea*. *FEMS Microbiol Ecol.* 2002;40: 143–149. doi:10.1111/j.1574-  
627 6941.2002.tb00946.x
- 628 48. Splivallo R, Fischer U, Göbel C, Feussner I, Karlovsky P. Truffles regulate plant root  
629 morphogenesis via the production of auxin and ethylene. *Plant Physiol.* 2009;150: 2018–  
630 2029. doi:10.1104/pp.109.141325
- 631 49. Ogawa T, Takahashi M, Fujii T, Tazaki M, Fukuda H. The Role of NADH:Fe(III)EDTA  
632 Oxidoreductase in Ethylene Formation from 2-Keto-4-Methylthiobutyrate. *J Ferment*  
633 *Bioeng.* 1990;69: 287–291. doi:10.1016/0922-338X(90)90107-8
- 634 50. Yang SF, Ku HS, Pratt HK. Photochemical production of ethylene from methionine and

- 635 its analogues in the presence of flavin mononucleotide. *J Biol Chem.* 1967;242: 5274–  
636 5280. Available: <http://www.jbc.org/>
- 637 51. Billington DC, Golding BT, Primrose SB. Biosynthesis of ethylene from methionine.  
638 Isolation of the putative intermediate 4-methylthio-2-oxobutanoate from culture fluids of  
639 bacteria and fungi. *Biochem J.* 1979;182: 827–836. doi:10.1042/bj1820827
- 640 52. Hottiger T, Boller T. Ethylene biosynthesis in *Fusarium oxysporum* f. sp. *tulipae* proceeds  
641 from glutamate/2-oxoglutarate and requires oxygen and ferrous ions in vivo. *Arch*  
642 *Microbiol.* 1991;157: 18–22. doi:10.1007/BF00245329
- 643 53. Esch H, Hundeshagen B, Schneider-Poetsch H, Bothe H. Demonstration of abscisic acid  
644 in spores and hyphae of the arbuscular-mycorrhizal fungus *Glomus* and in the N<sub>2</sub>-fixing  
645 cyanobacterium *Anabaena variabilis*. *Plant Sci.* 1994;99: 9–16. doi:10.1016/0168-  
646 9452(94)90115-5
- 647 54. Barea JM, Azcón-Aguilar C. Production of plant growth-regulating substances by the  
648 vesicular-arbuscular mycorrhizal fungus *Glomus mosseae*. *Appl Environ Microbiol.*  
649 1982;43: 810–3. doi: 10.1128/aem.43.4.810-813.1982
- 650 55. Ludwig-Müller J, Kaldorf M, Sutter EG, Epstein E. Indole-3-butyric acid (IBA) is  
651 enhanced in young maize (*Zea mays* L.) roots colonized with the arbuscular mycorrhizal  
652 fungus *Glomus intraradices*. *Plant Sci.* 1997;125: 153–162. doi:10.1016/S0168-  
653 9452(97)00064-2
- 654 56. Le Marquer M, Bécard G, Frei dit Frey N. Arbuscular mycorrhizal fungi possess a  
655 *CLAVATA3/embryo surrounding region*-related gene that positively regulates  
656 symbiosis. *New Phytol.* 2019;222: 1030–1042. doi:10.1111/nph.15643
- 657 57. Kojima M, Kamada-Nobusada T, Komatsu H, Takei K, Kuroha T, Mizutani M, et al.

- 658 Highly sensitive and high-throughput analysis of plant hormones using ms-probe  
659 modification and liquid chromatography tandem mass spectrometry: An application for  
660 hormone profiling in *oryza sativa*. *Plant Cell Physiol.* 2009;50: 1201–1214.  
661 doi:10.1093/pcp/pcp057
- 662 58. Hoyerova K, Gaudinova A, Malbeck J, Dobrev PI, Kocabek T, Solcova B, et al.  
663 Efficiency of different methods of extraction and purification of cytokinins.  
664 *Phytochemistry.* 2006;67: 1151–1159. doi:10.1016/j.phytochem.2006.03.010
- 665 59. Chen Y, Althiab Almasaud R, Carrie E, Desbrosses G, Binder BM, Chervin C. Ethanol, at  
666 physiological concentrations, affects ethylene sensing in tomato germinating seeds and  
667 seedlings. *Plant Sci.* 2020;291: 110368. doi:10.1016/j.plantsci.2019.110368
- 668 60. Fang N, Yu S, Ronis MJJ, Badger TM. Matrix effects break the LC behavior rule for  
669 analytes in LC-MS/MS analysis of biological samples. *Exp Biol Med.* 2015;240: 488–497.  
670 doi:10.1177/1535370214554545
- 671 61. Jacobsen J V, Mcglasson WB, Selby HB. Ethylene Production by Autoclaved Rubber  
672 Injection Caps Used in Biological Systems. *Plant Physiol.* 1970; 45(5): 631. doi:  
673 10.1104/pp.45.5.631
- 674 62. Primrose SB. Evaluation of the Role of Methional, 2-Keto-4-methylthiobutyric Acid and  
675 Peroxidase in Ethylene Formation by *Escherichia coli*. *J Gen Microbiol.* 1977;98: 519–  
676 528. doi:10.1099/00221287-98-2-519
- 677 63. Yang SF. Biosynthesis of ethylene. Ethylene formation from methional by horseradish  
678 peroxidase. *Arch Biochem Biophys.* 1967;122: 481–487. doi:10.1016/0003-  
679 9861(67)90222-6
- 680 64. Booker MA, DeLong A. Producing the ethylene signal: Regulation and diversification of

- 681 ethylene biosynthetic enzymes. *Plant Physiol.* 2015;169: 42–50. doi:10.1104/pp.15.00672
- 682 65. Houben M, Van de Poel B. 1-aminocyclopropane-1-carboxylic acid oxidase (ACO): The  
683 enzyme that makes the plant hormone ethylene. *Frontiers in Plant Science.* 2019. p. 695.  
684 doi:10.3389/fpls.2019.00695
- 685 66. Mukherjee A, Ané J-M. Germinating Spore Exudates from Arbuscular Mycorrhizal Fungi:  
686 Molecular and Developmental Responses in Plants and Their Regulation by Ethylene. *Mol*  
687 *Plant-Microbe Interact MPMI.* 2011;24: 260–270. doi:10.1094/MPMI
- 688 67. Giovannetti M, Mari A, Novero M, Bonfante P. Early *Lotus japonicus* root transcriptomic  
689 responses to symbiotic and pathogenic fungal exudates. *Front Plant Sci.* 2015;6: 480.  
690 doi:10.3389/fpls.2015.00480
- 691 68. Chabaud M, Genre A, Sieberer BJ, Faccio A, Fournier J, Novero M, et al. Arbuscular  
692 mycorrhizal hyphopodia and germinated spore exudates trigger Ca<sup>2+</sup> spiking in the  
693 legume and nonlegume root epidermis. *New Phytol.* 2011;189: 347–355.  
694 doi:10.1111/j.1469-8137.2010.03464.x
- 695 69. Dunwell JM, Purvis A, Khuri S. Cupins: The most functionally diverse protein  
696 superfamily? *Phytochemistry.* 2004;65: 7–17. doi:10.1016/j.phytochem.2003.08.016
- 697 70. Jentschel K, Thiel D, Rehn F, Ludwig-Müller J. Arbuscular mycorrhiza enhances auxin  
698 levels and alters auxin biosynthesis in *Tropaeolum majus* during early stages of  
699 colonization. *Physiol Plant.* 2006;129: 320–333. doi:10.1111/j.1399-3054.2006.00812.x
- 700 71. Meixner C, Ludwig-Müller J, Miersch O, Gresshoff P, Staehelin C, Vierheilig H. Lack of  
701 mycorrhizal autoregulation and phytohormonal changes in the supernodulating soybean  
702 mutant nts1007. *Planta.* 2005;222: 709–715. doi:10.1007/s00425-005-0003-4
- 703 72. Foo E. Something old, something new: Auxin and strigolactone interact in the ancient

- 704 mycorrhizal symbiosis. *Plant Signal Behav.* 2013;8. doi:10.4161/psb.23656
- 705 73. Buendia L, Maillet F, O'Connor D, van de-Kerkhove Q, Danoun S, Gough C, et al. Lipo-  
706 chitooligosaccharides promote lateral root formation and modify auxin homeostasis in  
707 *Brachypodium distachyon*. *New Phytol.* 2019;221: 2190–2202. doi:10.1111/nph.15551
- 708 74. Zsögön A, Lambais MR, Benedito VA, Figueira AVDO, Peres LEP. Reduced arbuscular  
709 mycorrhizal colonization in tomato ethylene mutants. *Sci Agric.* 2008;65: 259–267.  
710 doi:10.1590/S0103-90162008000300006
- 711 75. Fracetto GGM, Peres LEP, Mehdy MC, Lambais MR. Tomato ethylene mutants exhibit  
712 differences in arbuscular mycorrhiza development and levels of plant defense-related  
713 transcripts. *Symbiosis.* 2013;60: 155–167. doi:10.1007/s13199-013-0251-1
- 714 76. Hérivaux A, Dugé de Bernonville T, Roux C, Clastre M, Courdavault V, Gastebois A, et  
715 al. The Identification of Phytohormone Receptor Homologs in Early Diverging Fungi  
716 Suggests a Role for Plant Sensing in Land Colonization by Fungi. Taylor JW, editor.  
717 *MBio.* 2017;8: e01739-16. doi:10.1128/mBio.01739-16
- 718 77. Liu X, Feng Z, Zhu H, Yao Q. Exogenous abscisic acid and root volatiles increase  
719 sporulation of *Rhizophagus irregularis* DAOM 197198 in asymbiotic and pre-symbiotic  
720 status. *Mycorrhiza.* 2019;29: 581–589. doi:10.1007/s00572-019-00916-z
- 721 78. Nagata M, Yamamoto N, Miyamoto T, Shimomura A, Arima S, Hirsch AM, et al.  
722 Enhanced hyphal growth of arbuscular mycorrhizae by root exudates derived from high  
723 R/FR treated *Lotus japonicus*. *Plant Signal Behav.* 2016;11: e1187356.  
724 doi:10.1080/15592324.2016.1187356
- 725 79. van Dam NM, Bouwmeester HJ. Metabolomics in the Rhizosphere: Tapping into  
726 Belowground Chemical Communication. *Trends in Plant Science.* 2016. pp. 256–265.



- 727 doi:10.1016/j.tplants.2016.01.008
- 728 80. Kong CH, Zhang SZ, Li YH, Xia ZC, Yang XF, Meiners SJ, et al. Plant neighbor  
729 detection and allelochemical response are driven by root-secreted signaling chemicals. *Nat*  
730 *Commun.* 2018;9: 3867. doi:10.1038/s41467-018-06429-1
- 731 81. Kirwa HK, Murungi LK, Beck JJ, Torto B. Elicitation of Differential Responses in the  
732 Root-Knot Nematode *Meloidogyne incognita* to Tomato Root Exudate Cytokinin,  
733 Flavonoids, and Alkaloids. *J Agric Food Chem.* 2018;66: 11291–11300.  
734 doi:10.1021/acs.jafc.8b05101
- 735 82. Vives-Peris V, Gómez-Cadenas A, Pérez-Clemente RM. Citrus plants exude proline and  
736 phytohormones under abiotic stress conditions. *Plant Cell Rep.* 2017;36: 1971–1984.  
737 doi:10.1007/s00299-017-2214-0
- 738 83. Wang FF, Cheng ST, Wu Y, Ren BZ, Qian W. A Bacterial Receptor PcrK Senses the  
739 Plant Hormone Cytokinin to Promote Adaptation to Oxidative Stress. *Cell Rep.* 2017;21:  
740 2940–2951. doi:10.1016/j.celrep.2017.11.017
- 741 84. Galland L. The gut microbiome and the brain. *Journal of Medicinal Food.* 2014. pp. 1261–  
742 1272. doi:10.1089/jmf.2014.7000
- 743 85. Karavolos MH, Winzer K, Williams P, Khan CMA. Pathogen espionage: Multiple  
744 bacterial adrenergic sensors eavesdrop on host communication systems. *Molecular*  
745 *Microbiology.* 2013. pp. 455–465. doi:10.1111/mmi.12110
- 746 86. Urbanová T, Tarkowská D, Novák O, Hedden P, Strnad M. Analysis of gibberellins as  
747 free acids by ultra performance liquid chromatography-tandem mass spectrometry.  
748 *Talanta.* 2013;112: 85–94. doi:10.1016/j.talanta.2013.03.068
- 749 87. Šimura J, Antoniadi I, Šíroká J, Tarkowská D, Strnad M, Ljung K, et al. Plant

750 Hormonomics: Multiple Phytohormone Profiling by Targeted Metabolomics. Plant  
751 Physiol. 2018;177: 476–489. doi:10.1104/pp.18.00293

752

## 753 **Supporting information**

754 **S1 Table.** List of molecules analyzed by LC-MS in highly sensitive MRM mode

755 The hormone family, molecule name, abbreviation, formula, retention time, preferential  
756 detection mode, precursor and product ions for MRM analysis and limit of detection are  
757 indicated. Grey lines correspond to theoretical fragmentation values when standards were not  
758 available [86,87].

759 **S1 Fig.** High resolution mass spectra (HRMS) of iPR in positive mode

760 (A) and (B) HRMS spectra of iPR standard (300 nM), at 5.78 min. (C) and (D) HRMS spectra of  
761 250,000 *R. irregularis* GSE at 5.78 min. (A) and (C), MS spectra. (B) and (D) MS/MS ( $m/z$   
762 336.1666 +/- 0.5 Da) spectra.

763 **S2 Fig.** High resolution mass spectra (HRMS) of IAA in positive mode

764 (A) and (B) HRMS spectra of IAA standard (300 nM) at 6.19 min. (C) and (D) HRMS spectra  
765 of 250,000 *R. irregularis* GSE, at 6.19 min. (A) and (C) MS spectra. (B) and (D) MS/MS ( $m/z$   
766 176.0705 +/- 0.5Da) spectra.

767 **S3 Fig.** KMBA detection in multiple reaction monitoring (MRM) mode

768 (A) Structure and fragmentation pattern of KBMA. (B) UPLC-MRM-MS chromatogram of  
769 KMBA in negative mode. Top (blue lines): External standard (500 nM) of KMBA. Middle (red  
770 lines): GSE produced by 20,000 spores treated with 10 mM methionine. Bottom (green lines):  
771 GSE produced by 20,000 untreated spores. Plain lines are for  $m/z$  transition 147 > 47. Dashed  
772 lines are for  $m/z$  transition 147 > 99. Signal intensity is displayed in counts per second (cps).

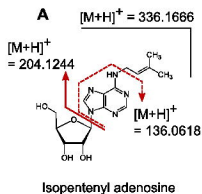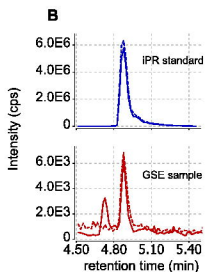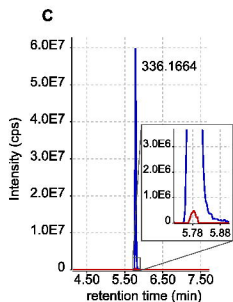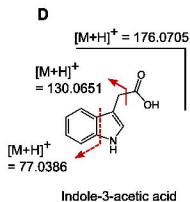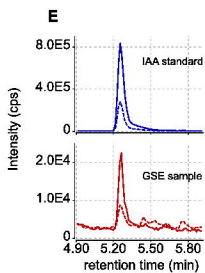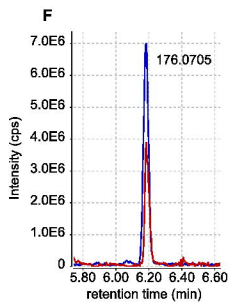

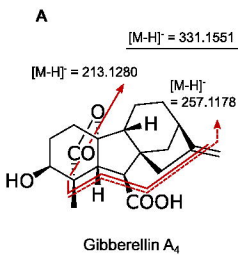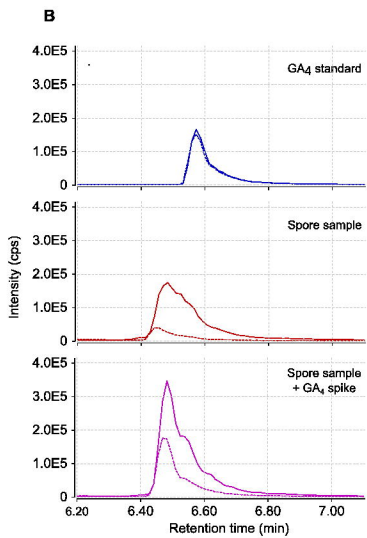

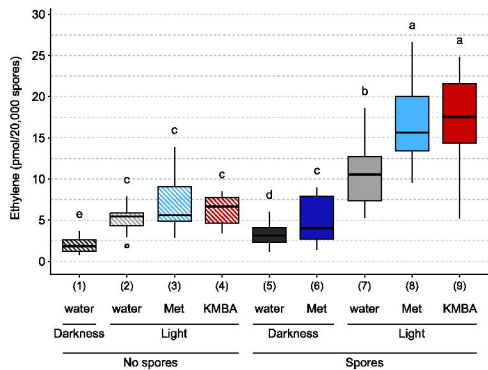

Source: https://www.biorxiv.org/content/10.1101/2020.06.11.146126v2.full.pdf
